# Supplementary material for: Abundance and physiology of dominant soft corals linked to water quality in Jakarta Bay, Indonesia
Source: PeerJ. 2016 Nov 29;4:e2625. doi: 10.7717/peerj.2625 (PMC5127238; doi:10.7717/peerj.2625)
Supplement: Supplemental Information 1 [file peerj-04-2625-s001.xlsx]

## Sheet: Nutrients
Inorganic nutrients
Abbreviations	Site	Ayer Besar (AB); Untung Jawa (UJ), Rambut (R); Pari South (PS); Pari North (PN); Gosong Panggang (P); Gosong Conkak (C); Kayu Angin Bira (B)
Date/Time	Coordinate [E]	Coordinate [S]	Depth [m]	Site	NO2 [µg/l]	NO3 [µg/l]	NH3 [µg/l]	PO4 [µg/l]
2012-11-05T08:50:00	106°46.911	05°58.399	1	UJ	0.015	0.04	0.07	0.09
2012-11-05T08:50:00	106°46.911	05°58.399	1	UJ	0.018	0.03	0.06	0.07
2012-11-05T08:50:00	106°46.911	05°58.399	1	UJ	0.017	0.04	0.06	0.1
2012-11-05T08:50:00	106°46.911	05°58.399	3	UJ	0.009	0.04	0.06	0.14
2012-11-05T08:50:00	106°46.911	05°58.399	3	UJ	0.008	0.03	0.08	0.12
2012-11-05T08:50:00	106°46.911	05°58.399	3	UJ	0.006	0.03	0.07	0.12
2012-11-05T13:20:00	106°46.911	05°58.399	1	UJ	0.014	0.06	0.11	0.28
2012-11-05T13:20:00	106°46.911	05°58.399	1	UJ	0.013	0.06	0.1	0.29
2012-11-05T13:20:00	106°46.911	05°58.399	1	UJ	0.015	0.05	0.08	0.25
2012-11-05T13:20:00	106°46.911	05°58.399	3	UJ	0.005	0.04	0.11	0.14
2012-11-05T13:20:00	106°46.911	05°58.399	3	UJ	0.003	0.04	0.1	0.17
2012-11-05T13:20:00	106°46.911	05°58.399	3	UJ	0.003	0.04	0.1	0.15
2012-11-06T10:00:00	106°42.242	05°58.399	1	AB	0.04	0.024	0.28	0.01
2012-11-06T10:00:00	106°42.242	05°58.399	1	AB	0.03	0.026	0.27	0.05
2012-11-06T10:00:00	106°42.242	05°58.399	1	AB	0.04	0.021	0.25	0.04
2012-11-06T10:00:00	106°42.242	05°58.399	3	AB	0.04	0.021	0.15	0.25
2012-11-06T10:00:00	106°42.242	05°58.399	3	AB	0.05	0.017	0.12	0.21
2012-11-06T10:00:00	106°42.242	05°58.399	3	AB	0.04	0.022	0.17	0.24
2012-11-06T13:45:00	106°42.242	05°58.399	1	AB	0.03	0.032	0.2	0.62
2012-11-06T13:45:00	106°42.242	05°58.399	1	AB	0.03	0.028	0.21	0.67
2012-11-06T13:45:00	106°42.242	05°58.399	1	AB	0.02	0.027	0.22	0.65
2012-11-06T13:45:00	106°42.242	05°58.399	3	AB	0.03	0.018	0.21	0.65
2012-11-06T13:45:00	106°42.242	05°58.399	3	AB	0.03	0.017	0.21	0.63
2012-11-06T13:45:00	106°42.242	05°58.399	3	AB	0.03	0.021	0.23	0.64
2012-11-08T07:40:00	106°41.597	05°58.202	1	R	0.03	0.023	0.09	0.1
2012-11-08T07:40:00	106°41.597	05°58.202	1	R	0.02	0.023	0.07	0.12
2012-11-08T07:40:00	106°41.597	05°58.202	1	R	0.02	0.025	0.1	0..09
2012-11-08T07:40:00	106°41.597	05°58.202	3	R	0.05	0.019	0.06	0.14
2012-11-08T07:40:00	106°41.597	05°58.202	3	R	0.06	0.017	0.05	0.15
2012-11-08T07:40:00	106°41.597	05°58.202	3	R	0.05	0.015	0.08	0.15
2012-11-08T09:20:00	106°41.597	05°58.202	1	R	0.01	0.03	0.05	0.1
2012-11-08T09:20:00	106°41.597	05°58.202	1	R	0.02	0.026	0.06	0.11
2012-11-08T09:20:00	106°41.597	05°58.202	1	R	0.01	0.029	0.06	0.11
2012-11-08T09:20:00	106°41.597	05°58.202	3	R	0.03	0.03	0.06	0.13
2012-11-08T09:20:00	106°41.597	05°58.202	3	R	0.03	0.028	0.06	0.14
2012-11-08T09:20:00	106°41.597	05°58.202	3	R	0.04	0.027	0.04	0.11
2012-11-15T09:00:00	106°36.963	05°52.094	1	PS	0.08	0.009	0.05	0.05
2012-11-15T09:00:00	106°36.963	05°52.094	1	PS	0.07	0.01	0.04	0.04
2012-11-15T09:00:00	106°36.963	05°52.094	1	PS	0.08	0.013	0.05	0.05
2012-11-15T09:00:00	106°36.963	05°52.094	3	PS	0.05	0.014	0.04	0.06
2012-11-15T09:00:00	106°36.963	05°52.094	3	PS	0.06	0.017	0.03	0.06
2012-11-15T09:00:00	106°36.963	05°52.094	3	PS	0.06	0.015	0.03	0.05
2012-11-15T12:10:00	106°36.963	05°52.094	1	PS	0.07	0.01	0.09	0.04
2012-11-15T12:10:00	106°36.963	05°52.094	1	PS	0.06	0.013	0.07	0.03
2012-11-15T12:10:00	106°36.963	05°52.094	1	PS	0.06	0.012	0.07	0.04
2012-11-15T12:10:00	106°36.963	05°52.094	3	PS	0.06	0.012	0.05	0.05
2012-11-15T12:10:00	106°36.963	05°52.094	3	PS	0.05	0.01	0.04	0.05
2012-11-15T12:10:00	106°36.963	05°52.094	3	PS	0.06	0.014	0.05	0.06
2012-11-16T08:10:00	106°37.440	05°51.001	1	PN	0.05	0	0.02	0.01
2012-11-16T08:10:00	106°37.440	05°51.001	1	PN	0.04	0	0.01	0.01
2012-11-16T08:10:00	106°37.440	05°51.001	1	PN	0.05	0	0.01	0.02
2012-11-16T08:10:00	106°37.440	05°51.001	3	PN	0.04	0.002	0.01	0.01
2012-11-16T08:10:00	106°37.440	05°51.001	3	PN	0.04	0.001	0.01	0.01
2012-11-16T08:10:00	106°37.440	05°51.001	3	PN	0.04	0.001	0.01	0.01
2012-11-16T11:27:00	106°37.440	05°51.001	1	PN	0.04	0	0	0.01
2012-11-16T11:27:00	106°37.440	05°51.001	1	PN	0.01	0	0	0.01
2012-11-16T11:27:00	106°37.440	05°51.001	1	PN	0.02	0	0	0.01
2012-11-16T11:27:00	106°37.440	05°51.001	3	PN	0.06	0	0.01	0.01
2012-11-16T11:27:00	106°37.440	05°51.001	3	PN	0.04	0	0.01	0.01
2012-11-16T11:27:00	106°37.440	05°51.001	3	PN	0.05	0	0.01	0.01
2012-11-19T10:45:00	106°34.162	05°36.405	1	B	0	0.005	0.04	0.19
2012-11-19T10:45:00	106°34.162	05°36.405	1	B	0	0.004	0.04	0.18
2012-11-19T10:45:00	106°34.162	05°36.405	1	B	0	0.004	0.04	0.19
2012-11-19T10:45:00	106°34.162	05°36.405	3	B	0.03	0.007	0.01	0.17
2012-11-19T10:45:00	106°34.162	05°36.405	3	B	0.03	0.006	0.02	0.16
2012-11-19T10:45:00	106°34.162	05°36.405	3	B	0.03	0.006	0.01	0.17
2012-11-19T13:45:00	106°34.162	05°36.405	1	B	0.01	0.004	0.03	0.16
2012-11-19T13:45:00	106°34.162	05°36.405	1	B	0.01	0.004	0.03	0.17
2012-11-19T13:45:00	106°34.162	05°36.405	1	B	0.01	0.003	0.03	0.16
2012-11-19T13:45:00	106°34.162	05°36.405	3	B	0	0.004	0.03	0.26
2012-11-19T13:45:00	106°34.162	05°36.405	3	B	0	0.004	0.02	0.25
2012-11-19T13:45:00	106°34.162	05°36.405	3	B	0	0.004	0.02	0.26
2012-11-20T10:10:00	106 35.274	05 42.303	1	C	0.01	0.006	0.21	0.01
2012-11-20T10:10:00	106 35.274	05 42.303	1	C	0.01	0.005	0.21	0.01
2012-11-20T10:10:00	106 35.274	05 42.303	1	C	0.01	0.006	0.21	0.01
2012-11-20T10:10:00	106 35.274	05 42.303	3	C	0.01	0.008	0.22	0
2012-11-20T10:10:00	106 35.274	05 42.303	3	C	0.01	0.007	0.22	0
2012-11-20T10:10:00	106 35.274	05 42.303	3	C	0.01	0.008	0.23	0
2012-11-20T13:10:00	106 35.274	05 42.303	1	C	0.01	0.006	0.19	0.01
2012-11-20T13:10:00	106 35.274	05 42.303	1	C	0.01	0.006	0.18	0.01
2012-11-20T13:10:00	106 35.274	05 42.303	1	C	0.01	0.005	0.19	0.01
2012-11-20T13:10:00	106 35.274	05 42.303	3	C	0.01	0.006	0.2	0
2012-11-20T13:10:00	106 35.274	05 42.303	3	C	0.01	0.007	0.21	0
2012-11-20T13:10:00	106 35.274	05 42.303	3	C	0.01	0.007	0.2	0
2012-11-21T10:40:00	106°35.355	05°44.664	1	P	0.02	0.015	0.06	0.28
2012-11-21T10:40:00	106°35.355	05°44.664	1	P	0.01	0.014	0.05	0.29
2012-11-21T10:40:00	106°35.355	05°44.664	1	P	0.02	0.015	0.06	0.28
2012-11-21T10:40:00	106°35.355	05°44.664	3	P	0.04	0.005	0.04	0.56
2012-11-21T10:40:00	106°35.355	05°44.664	3	P	0.03	0.004	0.03	0.58
2012-11-21T10:40:00	106°35.355	05°44.664	3	P	0.03	0.005	0.04	0.6
2012-11-21T13:45:00	106°35.355	05°44.664	1	P	0.02	0.008	0.02	0.35
2012-11-21T13:45:00	106°35.355	05°44.664	1	P	0.02	0.009	0.03	0.33
2012-11-21T13:45:00	106°35.355	05°44.664	1	P	0.02	0.008	0.03	0.31
2012-11-21T13:45:00	106°35.355	05°44.664	3	P	0.03	0.003	0.03	0.49
2012-11-21T13:45:00	106°35.355	05°44.664	3	P	0.03	0.002	0.02	0.44
2012-11-21T13:45:00	106°35.355	05°44.664	3	P	0.02	0.002	0.03	0.45

## Sheet: Sedimentation rate
Sedimentatition rate
Abbreviations	Site	Ayer Besar (AB); Untung Jawa (UJ), Rambut (R); Pari South (PS); Pari North (PN); Gosong Panggang (P); Gosong Conkak (C); Kayu Angin Bira (B)
Date/Time	Site	Coordinate [E]	Coordinate [S]	Sedimentation rate [g/m2/day]
2012-11-06T09:25:00	AB	106°42.242	05°58.399	26.8693
2012-11-06T09:25:00	AB	106°42.242	05°58.399	39.4938
2012-11-06T09:25:00	AB	106°42.242	05°58.399	30.5454
2012-11-06T09:25:00	AB	106°42.242	05°58.399	27.1837
2012-11-05T10:00:00	UJ	106°46.911	05°58.399	29.8124
2012-11-05T10:00:00	UJ	106°46.911	05°58.399	35.0334
2012-11-05T10:00:00	UJ	106°46.911	05°58.399	25.6224
2012-11-05T10:00:00	UJ	106°46.911	05°58.399
2012-11-08T09:10:00	R	106°41.597	05°58.202	29.105
2012-11-08T09:10:00	R	106°41.597	05°58.202	28.931
2012-11-08T09:10:00	R	106°41.597	05°58.202	32.876
2012-11-08T09:10:00	R	106°41.597	05°58.202
2012-11-15T09:02:00	PS	106°36.963	05°52.094	13.6604
2012-11-15T09:02:00	PS	106°36.963	05°52.094	8.50403
2012-11-15T09:02:00	PS	106°36.963	05°52.094	8.29059
2012-11-15T09:02:00	PS	106°36.963	05°52.094	11.7057
2012-11-16T08:06:00	PN	106°37.440	05°51.001	15.5701
2012-11-16T08:06:00	PN	106°37.440	05°51.001	15.9246
2012-11-16T08:06:00	PN	106°37.440	05°51.001	9.17189
2012-11-16T08:06:00	PN	106°37.440	05°51.001	14.9851
2012-11-21T09:58:00	P	106 35.274	05 42.303	15.3499
2012-11-21T09:58:00	P	106 35.274	05 42.303	14.4932
2012-11-21T09:58:00	P	106 35.274	05 42.303	14.8964
2012-11-21T09:58:00	P	106 35.274	05 42.303	12.9109
2012-11-20T09:30:00	C	106°35.355	05°44.664	16.472
2012-11-20T09:30:00	C	106°35.355	05°44.664	23.3039
2012-11-20T09:30:00	C	106°35.355	05°44.664	18.3405
2012-11-20T09:30:00	C	106°35.355	05°44.664	23.3497
2012-11-19T10:07:00	B	106°34.162	05°36.405	21.4691
2012-11-19T10:07:00	B	106°34.162	05°36.405	27.8051
2012-11-19T10:07:00	B	106°34.162	05°36.405	20.8596
2012-11-19T10:07:00	B	106°34.162	05°36.405	16.4554

## Sheet: Water parameters
Water parameters
Abbreviations	Site	Ayer Besar (AB); Untung Jawa (UJ), Rambut (R); Pari South (PS); Pari North (PN); Gosong Panggang (P); Gosong Conkak (C); Kayu Angin Bira (B)
Site	Date/time	Coordinate [E]	Coordinate [S]	Temperature [° C]	Depth [m]	pH	Salinity [PSU]	DO [%Sat]	DO [mg/l]	Turbidity [NTU]	Chl a [µg/l]
UJ	2012-11-05T08:49:00	106°46.911	05°58.399	30	1.03	8.05	32.51	82.9	5.62	1.6	32.8
UJ	2012-11-05T08:50:00	106°46.911	05°58.399	29.99	0.93	8.01	32.42	67.6	4.59	1	27.29
UJ	2012-11-05T08:51:00	106°46.911	05°58.399	30.01	0.99	8.01	32.44	63	4.27	1.4	26.29
UJ	2012-11-05T08:52:00	106°46.911	05°58.399	30	1.08	8.03	32.57	64	4.34	1.5	31.95
UJ	2012-11-05T08:53:00	106°46.911	05°58.399	30.02	1.06	8.02	32.54	65.9	4.47	1.5	29.3
UJ	2012-11-05T08:54:00	106°46.911	05°58.399	29.75	2.91	7.99	32.46	60.1	4.09	1.1	26.04
UJ	2012-11-05T08:55:00	106°46.911	05°58.399	29.76	2.84	7.99	32.44	57.5	3.91	0.9	30.87
UJ	2012-11-05T08:56:00	106°46.911	05°58.399	30	2.96	8.04	32.6	60.4	4.09	1.9	27.12
UJ	2012-11-05T08:57:00	106°46.911	05°58.399	30.13	3.08	8.06	32.68	74	5	2.5	33.97
UJ	2012-11-05T08:58:00	106°46.911	05°58.399	30.09	3.39	8.04	32.55	74.6	5.05	1.9	18.67
UJ	2012-11-05T13:19:00	106°46.911	05°58.399	30.51	1.15	8.15	32.75	97.4	6.54	0.9	3.12
UJ	2012-11-05T13:20:00	106°46.911	05°58.399	30.51	1.12	8.15	32.76	97.4	6.54	1.1	3.24
UJ	2012-11-05T13:21:00	106°46.911	05°58.399	30.5	1.13	8.15	32.76	96.5	6.49	1.1	3.06
UJ	2012-11-05T13:22:00	106°46.911	05°58.399	30.5	1.14	8.15	32.72	96.4	6.48	1.1	2.98
UJ	2012-11-05T13:23:00	106°46.911	05°58.399	30.51	3.24	8.15	32.7	97.1	6.52	1.4	3.11
UJ	2012-11-05T13:24:00	106°46.911	05°58.399	30.51	3.27	8.14	32.7	97.5	6.55	1	3.13
UJ	2012-11-05T13:25:00	106°46.911	05°58.399	30.5	3.34	8.15	32.68	97.5	6.56	1.1	3.2
UJ	2012-11-05T13:26:00	106°46.911	05°58.399	30.5	3.23	8.14	32.72	98	6.58	1.2	3.1
AB	2012-11-06T10:02:00	106°42.242	05°58.399	30.27	1.18	8.33	32.37	117.9	7.97	0.5	2.91
AB	2012-11-06T10:03:00	106°42.242	05°58.399	30.27	1.19	8.32	32.44	121.4	8.2	0.5	3.19
AB	2012-11-06T10:04:00	106°42.242	05°58.399	30.27	1.25	8.32	32.41	122.1	8.25	0.8	2.83
AB	2012-11-06T10:05:00	106°42.242	05°58.399	30.27	1.25	8.32	32.5	122.3	8.26	0.6	2.74
AB	2012-11-06T10:06:00	106°42.242	05°58.399	30.24	3.11	8.29	32.55	122.4	8.27	0.5	3.33
AB	2012-11-06T10:07:00	106°42.242	05°58.399	30.24	4.2	8.28	32.58	119.1	8.04	0.6	3.18
AB	2012-11-06T10:08:00	106°42.242	05°58.399	30.24	4.16	8.28	32.55	118.1	7.97	1.2	4.21
AB	2012-11-06T10:09:00	106°42.242	05°58.399	30.24	4.2	8.28	32.58	117.7	7.95	0.5	3.26
AB	2012-11-06T10:10:00	106°42.242	05°58.399	30.24	4.34	8.28	32.51	117.6	7.95	1.1	3.48
AB	2012-11-06T10:11:00	106°42.242	05°58.399	30.24	3.87	8.28	32.56	117.4	7.93	0.5	2.63
AB	2012-11-06T13:44:00	106°42.242	05°58.399	31.17	1.02	8.39	31.23	134.3	9	1	12.11
AB	2012-11-06T13:45:00	106°42.242	05°58.399	31.13	1.08	8.39	31.35	136.4	9.14	1	10.26
AB	2012-11-06T13:46:00	106°42.242	05°58.399	30.86	1.16	8.38	31.54	139	9.34	0.9	10.12
AB	2012-11-06T13:47:00	106°42.242	05°58.399	31.17	1.2	8.39	31.27	138.7	9.29	1.3	13.02
AB	2012-11-06T13:48:00	106°42.242	05°58.399	30.35	3.62	8.33	32.6	129.8	8.75	0.5	1.64
AB	2012-11-06T13:49:00	106°42.242	05°58.399	30.33	3.62	8.33	32.63	121.3	8.17	0.6	1.75
AB	2012-11-06T13:50:00	106°42.242	05°58.399	30.33	3.61	8.33	32.63	119.3	8.04	0.5	2.59
AB	2012-11-06T13:51:00	106°42.242	05°58.399	30.33	3.65	8.33	32.64	118.4	7.98	0.3	1.4
AB	2012-11-06T13:52:00	106°42.242	05°58.399	30.33	3.7	8.33	32.62	118	7.96	0.8	1.63
R	2012-11-08T07:30:00	106°41.597	05°58.202	30.44	0.95	8.22	32.14	101.3	6.48	3.2	31.87
R	2012-11-08T07:31:00	106°41.597	05°58.202	30.45	0.85	8.22	32.12	101	6.46	2.8	35.14
R	2012-11-08T07:32:00	106°41.597	05°58.202	30.44	1.08	8.2	32.18	103.7	6.63	3.3	22.5
R	2012-11-08T07:33:00	106°41.597	05°58.202	30.45	1.06	8.2	32.17	100.6	6.43	3.5	28.68
R	2012-11-08T07:34:00	106°41.597	05°58.202	30.44	0.97	8.17	32.23	99.6	6.36	2.8	24.41
R	2012-11-08T07:35:00	106°41.597	05°58.202	30.44	1.14	8.18	32.23	99.1	6.33	3.3	23.74
R	2012-11-08T07:36:00	106°41.597	05°58.202	30.44	1.12	8.18	32.18	97.4	6.22	3.1	26.57
R	2012-11-08T07:37:00	106°41.597	05°58.202	30.45	1.34	8.19	32.21	101.2	6.46	2.5	20.02
R	2012-11-08T07:38:00	106°41.597	05°58.202	30.37	2.91	7.87	32.66	43.8	2.79	4.5	2.52
R	2012-11-08T07:39:00	106°41.597	05°58.202	30.37	2.81	7.88	32.7	28.6	1.82	5.2	3.35
R	2012-11-08T07:40:00	106°41.597	05°58.202	30.37	2.85	7.87	32.73	26.4	1.68	4.7	2.83
R	2012-11-08T07:41:00	106°41.597	05°58.202	30.37	2.93	7.88	32.67	25.7	1.64	4.2	3.19
R	2012-11-08T07:42:00	106°41.597	05°58.202	30.37	2.92	7.88	32.72	26.3	1.68	4.3	3.27
R	2012-11-08T09:14:00	106°41.597	05°58.202	30.23	1.03	8.2	32.27	101.5	6.5	0.9	1.35
R	2012-11-08T09:15:00	106°41.597	05°58.202	30.23	1.07	8.18	32.38	101.8	6.52	0.8	1.22
R	2012-11-08T09:16:00	106°41.597	05°58.202	30.25	1.07	8.17	32.44	96.3	6.17	1.4	1.47
R	2012-11-08T09:17:00	106°41.597	05°58.202	30.25	1.1	8.17	32.4	94.8	6.07	1.5	3.81
R	2012-11-08T09:18:00	106°41.597	05°58.202	30.25	1.11	8.22	32.13	97.1	6.23	0.6	0.95
R	2012-11-08T09:19:00	106°41.597	05°58.202	30.26	1.11	8.17	32.49	102.4	6.55	1	1.15
R	2012-11-08T09:20:00	106°41.597	05°58.202	30.25	1	8.19	32.34	98.2	6.29	1.1	1.21
R	2012-11-08T09:21:00	106°41.597	05°58.202	30.24	4.16	8.18	32.56	98.8	6.32	1.3	2.26
R	2012-11-08T09:22:00	106°41.597	05°58.202	30.23	3.98	8.18	32.46	98.8	6.33	1.7	2.07
R	2012-11-08T09:23:00	106°41.597	05°58.202	30.23	3.98	8.18	32.57	99	6.33	0.9	2
R	2012-11-08T09:24:00	106°41.597	05°58.202	30.24	4.06	8.18	32.58	98.3	6.29	1.3	2.91
R	2012-11-08T09:25:00	106°41.597	05°58.202	30.25	4.05	8.16	32.5	96.5	6.18	1.7	2.1
R	2012-11-08T09:26:00	106°41.597	05°58.202	30.25	4	8.17	32.56	93.5	5.98	1.3	1.98
PS	2012-11-15T08:59:00	106°36.963	05°52.094	30.3	1.12	8.17	32.44	103.9	6.53	0.1	0.96
PS	2012-11-15T09:00:00	106°36.963	05°52.094	30.3	1.07	8.16	32.51	103.8	6.52	0.3	1.18
PS	2012-11-15T09:01:00	106°36.963	05°52.094	30.29	1.08	8.15	32.54	103.8	6.52	0.4	1.57
PS	2012-11-15T09:02:00	106°36.963	05°52.094	30.3	1.1	8.15	32.5	103.7	6.51	0.3	1.27
PS	2012-11-15T09:03:00	106°36.963	05°52.094	30.3	1.17	8.14	32.53	103.6	6.51	0.3	1.29
PS	2012-11-15T09:04:00	106°36.963	05°52.094	30.31	1.08	8.14	32.52	103.5	6.5	1.2	1.05
PS	2012-11-15T09:05:00	106°36.963	05°52.094	30.3	1.16	8.14	32.57	103.6	6.5	0.5	1.18
PS	2012-11-15T09:06:00	106°36.963	05°52.094	30.3	1.02	8.14	32.51	103.7	6.52	0.4	1.01
PS	2012-11-15T09:07:00	106°36.963	05°52.094	30.3	1.1	8.14	32.49	103.6	6.51	0.7	1.1
PS	2012-11-15T09:08:00	106°36.963	05°52.094	30.3	1.11	8.14	32.58	103.5	6.5	1.1	1.42
PS	2012-11-15T09:09:00	106°36.963	05°52.094	30.3	0.94	8.14	32.54	103.6	6.5	0.6	0.95
PS	2012-11-15T09:10:00	106°36.963	05°52.094	30.31	1.03	8.14	32.6	103.8	6.52	0.2	0.98
PS	2012-11-15T09:11:00	106°36.963	05°52.094	30.3	1.09	8.13	32.59	103.6	6.51	0.3	1.3
PS	2012-11-15T09:12:00	106°36.963	05°52.094	30.31	1.18	8.13	32.59	103.5	6.5	0.5	1.12
PS	2012-11-15T09:13:00	106°36.963	05°52.094	30.29	3.15	8.15	32.64	103.6	6.5	0.5	2.17
PS	2012-11-15T09:14:00	106°36.963	05°52.094	30.3	3.19	8.14	32.64	103.3	6.49	0.3	2.18
PS	2012-11-15T09:15:00	106°36.963	05°52.094	30.3	3.15	8.14	32.63	103.1	6.47	0.6	2.31
PS	2012-11-15T09:16:00	106°36.963	05°52.094	30.3	3.24	8.14	32.7	103.2	6.48	0.4	2.17
PS	2012-11-15T12:09:00	106°36.963	05°52.094	30.48	0.97	8.18	32.62	106	6.64	0.3	1.42
PS	2012-11-15T12:10:00	106°36.963	05°52.094	30.47	1.01	8.17	32.61	107.8	6.75	0.2	1.05
PS	2012-11-15T12:11:00	106°36.963	05°52.094	30.44	1.1	8.16	32.65	108.6	6.8	1.5	1.03
PS	2012-11-15T12:12:00	106°36.963	05°52.094	30.52	1.09	8.16	32.65	107.5	6.72	1.8	1.01
PS	2012-11-15T12:13:00	106°36.963	05°52.094	30.45	1.1	8.16	32.63	107	6.7	0.3	1.01
PS	2012-11-15T12:14:00	106°36.963	05°52.094	30.49	1.09	8.17	32.74	111.1	6.95	0.2	0.92
PS	2012-11-15T12:15:00	106°36.963	05°52.094	30.45	1.11	8.15	32.66	108.6	6.8	0.1	1.04
PS	2012-11-15T12:16:00	106°36.963	05°52.094	30.39	1.09	8.15	32.7	109	6.83	0.6	1.28
PS	2012-11-15T12:17:00	106°36.963	05°52.094	30.48	1.11	8.16	32.67	107	6.7	0.3	0.97
PS	2012-11-15T12:18:00	106°36.963	05°52.094	30.54	1.07	8.16	32.7	112.5	7.03	0.2	0.98
PS	2012-11-15T12:19:00	106°36.963	05°52.094	30.65	1.09	8.16	32.63	110.7	6.91	0.4	0.93
PS	2012-11-15T12:20:00	106°36.963	05°52.094	30.45	1.09	8.15	32.66	111.4	6.97	0.2	1.17
PS	2012-11-15T12:21:00	106°36.963	05°52.094	30.42	1.08	8.14	32.66	108.3	6.78	0.3	1.19
PS	2012-11-15T12:22:00	106°36.963	05°52.094	30.41	2.79	8.14	32.66	105.4	6.61	0.2	1.08
PS	2012-11-15T12:25:00	106°36.963	05°52.094	30.32	3.23	8.14	32.7	119.2	7.48	0.2	1.34
PS	2012-11-15T12:26:00	106°36.963	05°52.094	30.32	3.3	8.14	32.68	106.9	6.71	0.4	1.79
PS	2012-11-15T12:27:00	106°36.963	05°52.094	30.31	3.32	8.13	32.69	103.5	6.5	0.6	1.74
PS	2012-11-15T12:28:00	106°36.963	05°52.094	30.32	3.34	8.13	32.71	103.1	6.47	0.3	1.56
PS	2012-11-15T12:29:00	106°36.963	05°52.094	30.31	3.23	8.13	32.69	103.6	6.5	0.2	1.65
PS	2012-11-15T12:30:00	106°36.963	05°52.094	30.38	3.19	8.14	32.68	103.7	6.5	0.2	1.53
PS	2012-11-15T12:31:00	106°36.963	05°52.094	30.36	3.15	8.14	32.68	103.5	6.49	0.3	1.37
PS	2012-11-15T12:32:00	106°36.963	05°52.094	30.32	3.19	8.13	32.64	103.3	6.48	0.2	1.59
PS	2012-11-15T12:33:00	106°36.963	05°52.094	30.32	3.17	8.13	32.67	103.6	6.5	0.3	1.61
PS	2012-11-15T12:34:00	106°36.963	05°52.094	30.31	3.18	8.13	32.68	103.1	6.47	0.4	1.76
PS	2012-11-15T12:35:00	106°36.963	05°52.094	30.32	3.16	8.13	32.68	103	6.46	0.1	1.59
PS	2012-11-15T12:36:00	106°36.963	05°52.094	30.34	3.14	8.13	32.62	103.2	6.48	0.2	1.44
PN	2012-11-16T08:53:00	106°37.440	05°51.001	30.34	0.91	8.17	32.58	104.5	6.54	0.6	3.36
PN	2012-11-16T08:54:00	106°37.440	05°51.001	30.34	1.02	8.15	32.54	104.3	6.53	0.6	3.41
PN	2012-11-16T08:55:00	106°37.440	05°51.001	30.35	1.03	8.15	32.62	104.3	6.52	0.7	3.29
PN	2012-11-16T08:56:00	106°37.440	05°51.001	30.34	1.05	8.14	32.59	104.2	6.52	0.7	3.36
PN	2012-11-16T08:57:00	106°37.440	05°51.001	30.34	1.12	8.14	32.63	104.2	6.52	0.7	3.28
PN	2012-11-16T08:58:00	106°37.440	05°51.001	30.35	1.17	8.14	32.71	104	6.5	0.5	3.37
PN	2012-11-16T08:59:00	106°37.440	05°51.001	30.35	1.22	8.14	32.57	103.7	6.49	0.5	3.26
PN	2012-11-16T09:00:00	106°37.440	05°51.001	30.35	1.22	8.14	32.63	103.9	6.5	0.4	3.25
PN	2012-11-16T09:01:00	106°37.440	05°51.001	30.33	1.28	8.14	32.67	104.1	6.51	0.5	3.18
PN	2012-11-16T09:02:00	106°37.440	05°51.001	30.35	1.23	8.13	32.59	104.3	6.52	0.4	3.31
PN	2012-11-16T09:03:00	106°37.440	05°51.001	30.35	3.13	8.14	32.65	104.8	6.56	0.3	3.2
PN	2012-11-16T098:04:00	106°37.440	05°51.001	30.35	3.15	8.14	32.68	104.8	6.55	0.3	3.03
PN	2012-11-16T09:05:00	106°37.440	05°51.001	30.35	3.06	8.13	32.64	104.6	6.54	0.3	3.19
PN	2012-11-16T09:06:00	106°37.440	05°51.001	30.35	3.09	8.13	32.71	104.1	6.51	0.4	3.22
PN	2012-11-16T09:07:00	106°37.440	05°51.001	30.35	3.22	8.13	32.65	103.7	6.49	0.3	2.99
PN	2012-11-16T11:15:00	106°37.440	05°51.001	30.3	3.06	8.14	32.75	103.1	6.45	0.3	4.42
PN	2012-11-16T11:16:00	106°37.440	05°51.001	30.3	3.14	8.14	32.72	103.2	6.46	0.3	5.57
PN	2012-11-16T11:17:00	106°37.440	05°51.001	30.3	3.17	8.14	32.74	103.2	6.45	0.3	4.62
PN	2012-11-16T11:18:00	106°37.440	05°51.001	30.3	3.21	8.14	32.7	103.2	6.46	0.4	4.35
PN	2012-11-16T11:19:00	106°37.440	05°51.001	30.3	3.28	8.14	32.77	103.3	6.46	0.3	4.08
PN	2012-11-16T11:20:00	106°37.440	05°51.001	30.31	3.17	8.14	32.75	103.4	6.47	0.2	4.03
PN	2012-11-16T11:21:00	106°37.440	05°51.001	30.3	3.23	8.14	32.76	103.4	6.47	0.4	4.77
PN	2012-11-16T11:22:00	106°37.440	05°51.001	30.32	3.01	8.14	32.77	103.4	6.47	0.3	3.34
PN	2012-11-16T11:23:00	106°37.440	05°51.001	30.3	3.1	8.14	32.79	103.5	6.47	0.3	3.64
PN	2012-11-16T11:24:00	106°37.440	05°51.001	30.3	3.14	8.14	32.74	103.6	6.48	0.6	3.88
PN	2012-11-16T11:25:00	106°37.440	05°51.001	30.3	3.05	8.14	32.79	103.5	6.48	0.3	3.33
B	2012-11-19T10:49:00	106°34.162	05°36.405	30.43	1.11	8.21	32.42	119.6	7.33	1	1.11
B	2012-11-19T10:50:00	106°34.162	05°36.405	30.44	1.1	8.19	32.45	120.2	7.37	0.6	1.05
B	2012-11-19T10:51:00	106°34.162	05°36.405	30.45	1.07	8.19	32.68	121.9	7.46	0.7	1.18
B	2012-11-19T10:52:00	106°34.162	05°36.405	30.38	1.08	8.15	32.67	119.2	7.31	0.5	1.43
B	2012-11-19T10:53:00	106°34.162	05°36.405	30.34	1.12	8.14	32.69	111.5	6.84	0.7	1.37
B	2012-11-19T10:54:00	106°34.162	05°36.405	30.42	1.04	8.16	32.68	113.2	6.94	0.5	1
B	2012-11-19T10:55:00	106°34.162	05°36.405	30.47	1.09	8.17	32.76	115.8	7.08	0.7	1
B	2012-11-19T10:56:00	106°34.162	05°36.405	30.45	1.07	8.16	32.69	118.2	7.24	0.6	1.13
B	2012-11-19T10:57:00	106°34.162	05°36.405	30.42	1.07	8.15	32.73	113.7	6.96	0.7	1.23
B	2012-11-19T10:58:00	106°34.162	05°36.405	30.46	1.09	8.16	32.74	116.8	7.15	0.8	0.99
B	2012-11-19T10:59:00	106°34.162	05°36.405	30.31	3.13	8.13	32.68	110.5	6.78	0.5	1.46
B	2012-11-19T11:00:00	106°34.162	05°36.405	30.32	3.16	8.13	32.72	105.4	6.46	0.4	1.28
B	2012-11-19T11:01:00	106°34.162	05°36.405	30.31	3.18	8.13	32.75	104.9	6.43	0.7	6.42
B	2012-11-19T11:02:00	106°34.162	05°36.405	30.31	3.23	8.13	32.77	104.4	6.4	0.5	1.33
B	2012-11-19T11:03:00	106°34.162	05°36.405	30.31	2.93	8.13	32.72	104.1	6.38	0.6	1.33
B	2012-11-19T11:04:00	106°34.162	05°36.405	30.33	2.97	8.12	32.74	103.8	6.37	0.6	1.12
B	2012-11-19T13:47:00	106°34.162	05°36.405	30.33	1.01	8.11	32.77	102.1	6.26	0.5	1.04
B	2012-11-19T13:48:00	106°34.162	05°36.405	30.35	1.07	8.12	32.78	103.1	6.32	0.4	1.05
B	2012-11-19T13:49:00	106°34.162	05°36.405	30.31	0.93	8.12	32.81	102.8	6.3	1.4	1.08
B	2012-11-19T13:50:00	106°34.162	05°36.405	30.32	1.02	8.12	32.85	104.2	6.39	0.7	1.93
B	2012-11-19T13:51:00	106°34.162	05°36.405	30.35	1.08	8.12	32.78	103.2	6.33	0.5	2.47
B	2012-11-19T13:52:00	106°34.162	05°36.405	30.32	1.07	8.12	32.77	102.4	6.28	0.4	1.77
B	2012-11-19T13:53:00	106°34.162	05°36.405	30.33	1.02	8.13	32.8	102.3	6.27	0.4	1.98
B	2012-11-19T13:54:00	106°34.162	05°36.405	30.31	1.03	8.12	32.82	102.3	6.27	0.2	2.02
B	2012-11-19T13:55:00	106°34.162	05°36.405	30.34	0.79	8.12	32.8	102	6.25	0.4	1.83
B	2012-11-19T13:56:00	106°34.162	05°36.405	30.3	3.07	8.12	32.77	101.9	6.25	0.6	2.17
B	2012-11-19T13:57:00	106°34.162	05°36.405	30.32	3.09	8.11	32.72	101.2	6.21	0.3	1.76
C	2012-11-20T10:12:00	106 35.274	05 42.303	30.38	1.18	8.16	32.54	107	6.71	0.4	0.83
C	2012-11-20T10:13:00	106 35.274	05 42.303	30.39	1.09	8.14	32.5	107	6.71	0.6	0.81
C	2012-11-20T10:14:00	106 35.274	05 42.303	30.37	1.15	8.13	32.58	106.4	6.68	0.5	0.81
C	2012-11-20T10:15:00	106 35.274	05 42.303	30.36	1.05	8.13	32.54	108.3	6.79	0.4	0.81
C	2012-11-20T10:16:00	106 35.274	05 42.303	30.35	1.14	8.13	32.63	110	6.9	1	0.85
C	2012-11-20T10:17:00	106 35.274	05 42.303	30.33	1.18	8.13	32.57	110.3	6.92	0.6	0.77
C	2012-11-20T10:18:00	106 35.274	05 42.303	30.32	1.17	8.12	32.6	111	6.97	0.4	0.75
C	2012-11-20T10:19:00	106 35.274	05 42.303	30.32	1.15	8.12	32.63	112.1	7.03	0.4	0.7
C	2012-11-20T10:20:00	106 35.274	05 42.303	30.35	1.09	8.12	32.55	110.3	6.92	0.4	0.77
C	2012-11-20T10:21:00	106 35.274	05 42.303	30.34	1.16	8.12	32.58	111	6.97	0.5	0.71
C	2012-11-20T10:22:00	106 35.274	05 42.303	30.18	3.2	8.12	32.68	107.4	6.75	0.9	0.93
C	2012-11-20T10:23:00	106 35.274	05 42.303	30.17	3.16	8.12	32.75	104.5	6.57	0.3	1
C	2012-11-20T10:24:00	106 35.274	05 42.303	30.2	3.18	8.12	32.72	103.9	6.53	1.5	0.96
C	2012-11-20T10:25:00	106 35.274	05 42.303	30.16	3.26	8.12	32.74	104.2	6.55	0.7	0.96
C	2012-11-20T10:26:00	106 35.274	05 42.303	30.19	3.1	8.12	32.7	106.2	6.67	0.6	0.88
C	2012-11-20T10:27:00	106 35.274	05 42.303	30.17	3.29	8.12	32.75	106.2	6.68	0.4	0.95
C	2012-11-20T10:28:00	106 35.274	05 42.303	30.19	3.17	8.12	32.73	104.8	6.59	0.3	0.85
C	2012-11-20T10:29:00	106 35.274	05 42.303	30.18	3.23	8.12	32.73	104.1	6.54	1.7	0.9
C	2012-11-20T10:30:00	106 35.274	05 42.303	30.18	3.23	8.12	32.81	102.9	6.47	0.6	0.98
C	2012-11-20T10:31:00	106 35.274	05 42.303	30.19	3.14	8.12	32.72	102.1	6.42	0.3	1.01
C	2012-11-20T13:37:00	106 35.274	05 42.303	30.54	1.05	8.3	32.81	104.6	6.53	0.2	0.78
C	2012-11-20T13:38:00	106 35.274	05 42.303	30.49	1.08	8.29	32.82	104.2	6.52	0.3	0.73
C	2012-11-20T13:39:00	106 35.274	05 42.303	30.48	1.16	8.27	32.82	104.1	6.51	0.4	0.81
C	2012-11-20T13:40:00	106 35.274	05 42.303	30.54	1.2	8.26	32.87	104.2	6.51	0.3	0.75
C	2012-11-20T13:41:00	106 35.274	05 42.303	30.51	1.3	8.25	32.84	104.1	6.5	0.4	0.8
C	2012-11-20T13:42:00	106 35.274	05 42.303	30.53	1.16	8.24	32.86	104.5	6.53	0.5	0.78
C	2012-11-20T13:43:00	106 35.274	05 42.303	30.57	1.21	8.23	32.81	104.8	6.54	0.4	0.72
C	2012-11-20T13:44:00	106 35.274	05 42.303	30.48	1.22	8.23	32.86	104.4	6.53	0.5	0.82
C	2012-11-20T13:45:00	106 35.274	05 42.303	30.45	1.11	8.22	32.84	104.2	6.52	0.3	0.77
C	2012-11-20T13:46:00	106 35.274	05 42.303	30.43	1.98	8.21	32.89	104.3	6.53	0.5	0.8
C	2012-11-20T13:47:00	106 35.274	05 42.303	30.41	2.94	8.21	32.86	103	6.45	1.1	0.91
C	2012-11-20T13:48:00	106 35.274	05 42.303	30.44	3.04	8.2	32.9	103.1	6.45	0.5	0.92
C	2012-11-20T13:49:00	106 35.274	05 42.303	30.35	2.98	8.2	32.85	103.4	6.48	0.3	0.89
C	2012-11-20T13:50:00	106 35.274	05 42.303	30.38	2.91	8.2	32.92	103.6	6.48	0.4	1
C	2012-11-20T13:51:00	106 35.274	05 42.303	30.4	2.94	8.19	32.87	103.1	6.45	0.5	0.97
C	2012-11-20T13:52:00	106 35.274	05 42.303	30.35	3.02	8.19	32.88	102.8	6.44	0.5	1.11
C	2012-11-20T13:53:00	106 35.274	05 42.303	30.39	2.94	8.19	32.93	103	6.44	0.6	1.05
C	2012-11-20T13:54:00	106 35.274	05 42.303	30.39	3.07	8.18	32.85	103.5	6.48	0.5	1.02
C	2012-11-20T13:55:00	106 35.274	05 42.303	30.34	3.07	8.18	32.92	103.3	6.47	0.3	1
C	2012-11-20T13:56:00	106 35.274	05 42.303	30.37	3.03	8.18	32.92	103.2	6.46	0.4	1.02
C	2012-11-20T13:57:00	106 35.274	05 42.303	30.38	3.03	8.18	32.88	103.5	6.48	0.4	0.9
P	2012-11-21T10:45:00	106°35.355	05°44.664	30.49	0.96	8.23	32.8	112.8	6.99	0.3	1.1
P	2012-11-21T10:46:00	106°35.355	05°44.664	30.22	1	8.19	32.86	110.4	6.88	0.5	1.81
P	2012-11-21T10:47:00	106°35.355	05°44.664	30.28	1.01	8.18	32.82	105	6.53	0.7	0.97
P	2012-11-21T10:48:00	106°35.355	05°44.664	30.21	0.99	8.17	32.75	105	6.54	0.4	1.08
P	2012-11-21T10:49:00	106°35.355	05°44.664	30.29	1.14	8.17	32.82	106.1	6.6	0.3	0.98
P	2012-11-21T10:50:00	106°35.355	05°44.664	30.27	1.14	8.16	32.84	107.5	6.69	0.5	0.95
P	2012-11-21T10:51:00	106°35.355	05°44.664	30.23	1.19	8.15	32.89	110.5	6.88	0.4	1.03
P	2012-11-21T10:52:00	106°35.355	05°44.664	30.24	1.05	8.15	32.8	108	6.72	0.4	1.09
P	2012-11-21T10:53:00	106°35.355	05°44.664	30.2	1.1	8.14	32.96	106	6.6	0.4	1.04
P	2012-11-21T10:54:00	106°35.355	05°44.664	30.19	1.16	8.14	32.91	103.5	6.44	0.5	1.35
P	2012-11-21T10:55:00	106°35.355	05°44.664	30.17	1.17	8.14	32.89	102.3	6.37	0.6	1.13
P	2012-11-21T10:56:00	106°35.355	05°44.664	30.17	1.08	8.14	32.87	101.7	6.33	0.7	1.11
P	2012-11-21T10:57:00	106°35.355	05°44.664	30.06	3.09	8.14	32.94	98.8	6.16	0.5	1.2
P	2012-11-21T10:58:00	106°35.355	05°44.664	30.07	3.1	8.14	32.93	97	6.05	0.7	1.19
P	2012-11-21T10:59:00	106°35.355	05°44.664	30.07	3.08	8.14	32.98	96.7	6.03	0.6	1.19
P	2012-11-21T11:00:00	106°35.355	05°44.664	30.07	3.26	8.14	32.93	96.6	6.02	0.5	1.21
P	2012-11-21T11:01:00	106°35.355	05°44.664	30.08	3.32	8.13	32.95	96.8	6.04	0.6	1.27
P	2012-11-21T11:02:00	106°35.355	05°44.664	30.08	3.14	8.14	33.04	97.3	6.07	0.4	3.9
P	2012-11-21T11:03:00	106°35.355	05°44.664	30.07	3.36	8.13	32.95	97.2	6.06	1.1	1.24
P	2012-11-21T11:04:00	106°35.355	05°44.664	30.08	3.36	8.13	32.95	96.7	6.03	0.4	1.24
P	2012-11-21T11:05:00	106°35.355	05°44.664	30.08	3.22	8.13	32.95	96.4	6.01	0.4	1.33
P	2012-11-21T11:06:00	106°35.355	05°44.664	30.08	3.33	8.13	33	96.5	6.01	0.6	1.16
P	2012-11-21T11:07:00	106°35.355	05°44.664	30.08	3.36	8.13	32.98	96.5	6.02	0.4	3.6
P	2012-11-21T13:45:00	106°35.355	05°44.664	30.17	1.04	8.14	32.92	99.4	6.19	0.5	1.78
P	2012-11-21T13:46:00	106°35.355	05°44.664	30.14	0.96	8.14	32.97	98.9	6.16	0.5	2.09
P	2012-11-21T13:47:00	106°35.355	05°44.664	30.13	1.01	8.13	32.93	98.7	6.15	0.7	1.82
P	2012-11-21T13:48:00	106°35.355	05°44.664	30.13	1	8.13	32.96	98.5	6.14	0.5	1.99
P	2012-11-21T13:49:00	106°35.355	05°44.664	30.15	0.99	8.13	32.97	98.5	6.14	1.5	2.35
P	2012-11-21T13:50:00	106°35.355	05°44.664	30.14	0.96	8.13	33	98.5	6.14	0.6	1.75
P	2012-11-21T13:51:00	106°35.355	05°44.664	30.13	1.01	8.13	32.99	98.5	6.14	0.4	1.89
P	2012-11-21T13:52:00	106°35.355	05°44.664	30.17	0.99	8.13	32.94	98.6	6.14	0.3	2.07
P	2012-11-21T13:53:00	106°35.355	05°44.664	30.15	0.99	8.13	33	98.8	6.15	0.4	1.66
P	2012-11-21T13:54:00	106°35.355	05°44.664	30.2	1	8.13	33	99.5	6.19	0.3	1.5
P	2012-11-21T13:55:00	106°35.355	05°44.664	30.2	0.97	8.13	32.97	100.7	6.27	0.4	1.84
P	2012-11-21T13:56:00	106°35.355	05°44.664	30.14	1.02	8.13	32.95	99.1	6.18	0.3	1.65
P	2012-11-21T13:57:00	106°35.355	05°44.664	30.12	2.67	8.13	33.02	98.4	6.13	0.4	2.11
P	2012-11-21T13:58:00	106°35.355	05°44.664	30.1	2.57	8.13	33	98	6.11	0.6	2.09
P	2012-11-21T13:59:00	106°35.355	05°44.664	30.1	3.1	8.13	32.97	97.6	6.09	0.6	1.96
P	2012-11-21T13:60:00	106°35.355	05°44.664	30.11	3.16	8.13	33	97.6	6.08	0.6	1.96
P	2012-11-21T13:61:00	106°35.355	05°44.664	30.11	3.15	8.13	33.03	97.7	6.09	0.7	2.64
P	2012-11-21T13:62:00	106°35.355	05°44.664	30.11	3.13	8.13	32.97	97.6	6.09	0.5	2.16
P	2012-11-21T13:63:00	106°35.355	05°44.664	30.11	3.14	8.13	32.98	97.6	6.08	0.7	2.31
P	2012-11-21T13:64:00	106°35.355	05°44.664	30.11	3.08	8.13	32.99	97.7	6.09	0.5	1.75

## Sheet: Benthic cover
Benthic cover
Abbreviations:	Site:	Ayer Besar (AB); Untung Jawa (UJ), Rambut (R); Pari South (PS); Pari North (PN); Gosong Panggang (P); Gosong Conkak (C); Kayu Angin Bira (B)
Date/time	site	Coordinate [E]	Coordinate [S]	Hard coral [% cover]	Macroalgae [% cover]	Soft coral [% cover]	Nephthea sp. [% cover]	Sarcophyton sp. [% cover]	Total coral [% cover]	Other live [% cover]
2012-11-06T09:25:00	AB	106°42.242	05°58.399	8.21175	6.34	2.79283	1.62568	1.12547	11.0046	2.0842
2012-11-06T09:25:00	AB	106°42.242	05°58.399	2.98631	9.82	13.4384	2.98631	10.4521	16.4247	5.55786
2012-11-06T09:25:00	AB	106°42.242	05°58.399	2.31425	8.9	9.54121	6.69915	2.59846	11.8555	3.08567
2012-11-05T10:00:00	UJ	106°46.911	05°58.399	2.31191	11.011	8.30721	6.93574	0.901254	10.6191	3.33072
2012-11-05T10:00:00	UJ	106°46.911	05°58.399	0.922432	10.3145	10.5241	7.46331	2.43187	11.4465	3.39623
2012-11-05T10:00:00	UJ	106°46.911	05°58.399	0	8.38253	5.62771	2.63676	1.02322	5.62771	1.53483
2012-11-08T09:10:00	R	106°41.597	05°58.202	1.90822	5.2249	27.6238	0.363471	22.0354	29.532	4.36165
2012-11-08T09:10:00	R	106°41.597	05°58.202	2.41275	10.642	24.9892	2.62818	13.6148	27.402	1.63723
2012-11-08T09:10:00	R	106°41.597	05°58.202	0.250784	11.5361	11.7868	3.88715	6.89655	12.0376	0.877743
2012-11-15T09:02:00	PS	106°36.963	05°52.094	21.7061	2.32264	10.0929	0.253378	0	31.799	1.39358
2012-11-15T09:02:00	PS	106°36.963	05°52.094	31.3084	2.29397	2.20901	0.0424809	0.849618	33.5174	1.06202
2012-11-15T09:02:00	PS	106°36.963	05°52.094	31.5086	1.54618	5.22357	0	0	36.7321	2.88341
2012-11-16T08:06:00	PN	106°37.440	05°51.001	36.9583	0.583333	5.125	0.458333	0.0416667	42.0833	0.5
2012-11-16T08:06:00	PN	106°37.440	05°51.001	41.8109	3.58149	0.603622	0.160966	0	42.4145	1.97183
2012-11-16T08:06:00	PN	106°37.440	05°51.001	61.2305	2.31774	0.379267	0.0421408	0	61.6098	0.969237
2012-11-21T09:58:00	P	106°35.355	05°44.664	27.4207	1.79466	20.9098	0.208681	15.6093	48.3306	4.09015
2012-11-21T09:58:00	P	106°35.355	05°44.664	10.8864	14.1566	13.167	0	12.7367	24.0534	1.41997
2012-11-21T09:58:00	P	106°35.355	05°44.664	14.125	6.33333	32.9167	0	30.1667	47.0417	1.58333
2012-11-20T09:30:00	C	106 35.274	05 42.303	27.7755	2.97444	7.03812	0	5.06912	34.8136	4.52451
2012-11-20T09:30:00	C	106 35.274	05 42.303	29.0818	4.07146	2.82509	0	1.16327	31.9069	6.43955
2012-11-20T09:30:00	C	106 35.274	05 42.303	33.9361	2.06056	2.81749	0	2.31287	36.7536	8.11606
2012-11-19T10:07:00	B	106°34.162	05°36.405	14.9629	1.2366	0.12366	0	0.12366	15.0866	5.77082
2012-11-19T10:07:00	B	106°34.162	05°36.405	18.1389	0.857633	0.300172	0.128645	0	18.4391	8.4048
2012-11-19T10:07:00	B	106°34.162	05°36.405	23.7995	0.631845	0.505476	0	0.042123	24.305	7.91912

## Sheet: ETS activity
ETS activity [µmolO2 min-1 gm-1 h-1]
Abbreviations:	Site:	Ayer Besar (AB); Untung Jawa (UJ), Rambut (R); Pari South (PS); Pari North (PN); Gosong Panggang (P); Gosong Conkak (C); Kayu Angin Bira (B)
	AB	UJ	R	PS	PN	P	C	B
Nephthea sp.	11.8388	19.7221	18.4176	32.89	44.7283	15.7788	18.4218	19.7294
	15.7776	23.6787	35.512	19.7229	23.6711	19.7294	26.3178	23.6753
	15.7804	19.731	27.6303	27.6112	42.0785	15.7835	22.3531	24.9906
	19.7294	19.7398	27.6144	19.7301		15.7835	22.3645
	19.7275			44.7133		19.7254	36.832
Sarcophyton sp.	AB	UJ	R	PS	PN	P	C	B
	19.722	15.7852	27.6149	39.4565	43.427	31.5791	23.6711	31.5606
	22.3645	19.7347	27.6297	35.521	31.5652	15.7819	19.737	17.0988
	6.57648	32.8824	38.1471	34.2348	42.0935	18.4219	35.5279	23.6753
		17.0988	35.4968	31.5592		35.513

## Sheet: Photosynthetic yield
Photosynthetic yield [Fv/Fm]
Abbreviations:	Site:	Ayer Besar (AB); Untung Jawa (UJ), Rambut (R); Pari South (PS); Pari North (PN); Gosong Panggang (P); Gosong Conkak (C); Kayu Angin Bira (B)
Nephthea sp.	AB	UJ	R	PS	PN	P	C	B
	0.617	0.5135	0.6735	0.71925		0.60075	0.677	0.742
	0.564	0.4905	0.6945	0.652	0.72975	0.6705	0.681	0.71775
	0.55025	0.58275	0.6675	0.62825	0.74025	0.72	0.71975	0.6805
	0.6345	0.63775	0.70475	0.7115	0.72475	0.667333	0.695	0.71175
	0.545	0.63625	0.611	0.57	0.704333	0.642	0.70225	0.67225
	0.56175	0.62425	0.7345	0.7285	0.734333	0.63525	0.7035	0.62625
	0.5878	0.59325		0.71425	0.741333	0.638333	0.68525	0.6235
	0.61025
Sarcophyton sp.	AB	UJ	R	PS	PN	P	C	B
	0.3385	0.635	0.603	0.71925	0.72175	0.6285	0.629	0.75725
	0.3495	0.63225	0.49275	0.652	0.72925	0.678333	0.7075	0.7325
	0.47425	0.57075	0.5565	0.62825	0.71125	0.681	0.7435	0.785
	0.477	0.6285	0.59175	0.7115	0.72725	0.663333	0.697	0.7355
	0.4875	0.5985	0.5284	0.57	0.74775	0.69075		0.69175
	0.59875	0.58575	0.66925	0.7285	0.69825	0.67		0.67775
		0.56475	0.63725	0.71425	0.7095	0.691
